# Supplementary material
Source: publisher figshare collection journal article supplement (https://gsajournals.figshare.com/ndownloader/files/25417229)
Supplement: Supplementary file 1 [file 25417229]

Supplementary Material

**Evolution of Chi motifs in Proteobacteria**

Angélique Buton & Louis-Marie Bobay

Department of Biology, University of North Carolina Greensboro, 321 McIver Street, PO Box 26170, Greensboro, NC 27402, USA

**Table S1.** Statistical overrepresentation of Chi motifs across Markov models.

| **Markov model** | **Oligonucleotide composition** | ***Z* score** | | **O/E ratio (observed/expected)** | |
| --- | --- | --- | --- | --- | --- |
|  |  | Value in *E. coli* | Threshold used | Value in *E. coli* | Threshold |
| used |
| Markov 0 | Mononucleotides | 53.6 | 49 | 2.5 | 2 |
| Markov 1 | Di-nucleotides | 46 | 42 | 2.8 | 2 |
| Markov 2 | Tri-nucleotides | 17.3 | 13 | 1.6 | 1.3 |
| Markov 3 | Tetra-nucleotides | 7.9 | 5 | 1.2 | 1.2 |
| Markov 4 | Penta-nucleotides | 11.6 | 8 | 1.5 | 1.2 |
| Markov 5 | Hexa-nucleotides | 8.9 | 6 | 1.2 | 1.2 |
